# Supplementary material for: Molecular mechanism of Danxiong Tongmai Granules in treatment of coronary heart disease
Source: publisher site journal article supplement (doi:10.18632/aging.205845), 2024-05-21
Supplement: Supplementary file [file aging-v16i10-205845-supplementary-material-SD1.pdf]

## SUPPLEMENTARY TABLES

**Supplementary Table 1. Active ingredients of DXTMG.**

| Drug                 | Active ingredients                | No. | Drug                  | Active ingredients        | No.  |
|----------------------|-----------------------------------|-----|-----------------------|---------------------------|------|
| Radix Paeoniae Rubra | (-)-Catechin                      | a1  | Salvia miltiorrhiza   | Isotanshinone II          | a111 |
| Radix Paeoniae Rubra | (+)-Catechin                      | a2  | Salvia miltiorrhiza   | Isotenulin                | a112 |
| Radix Paeoniae Rubra | Albiflorin                        | a3  | Salvia miltiorrhiza   | Lithospermate B           | a113 |
| Radix Paeoniae Rubra | Beta-Sitosterol                   | a4  | Salvia miltiorrhiza   | Lithospermic Acid         | a114 |
| Radix Paeoniae Rubra | Catechin                          | a5  | Salvia miltiorrhiza   | Magnesium Lithospermate B | a115 |
| Radix Paeoniae Rubra | Epigallocatechin                  | a6  | Salvia miltiorrhiza   | Miltionone I              | a116 |
| Radix Paeoniae Rubra | Gallocatechin                     | a7  | Salvia miltiorrhiza   | Miltirone                 | a117 |
| Radix Paeoniae Rubra | Lactiflorin                       | a8  | Salvia miltiorrhiza   | Monomethyl Lithospermate  | a118 |
| Radix Paeoniae Rubra | Paeonol                           | a9  | Salvia miltiorrhiza   | Neocryptotanshinone       | a119 |
| Ligusticum wallichii | (Z,Z')-Diligustilide              | a10 | Salvia miltiorrhiza   | Neocryptotanshinone II    | a120 |
| Ligusticum wallichii | ta-Hydroxybutyryl)-10-Deacetylbac | a11 | Salvia miltiorrhiza   | Neotanshinone C           | a121 |
| Ligusticum wallichii | 13-Methyl Pentadecanoic Acid      | a12 | Salvia miltiorrhiza   | Rosmarinine               | a122 |
| Ligusticum wallichii | 1-Methoxy-2-Methylantraquinone    | a13 | Salvia miltiorrhiza   | Salonitenolide            | a123 |
| Ligusticum wallichii | 1-Phenyl-1-Pentanone              | a14 | Salvia miltiorrhiza   | Salvianolicacid B         | a124 |
| Ligusticum wallichii | -2,6-Dimethyl-8-(3-Methyl-2-Buten | a15 | Salvia miltiorrhiza   | Salvinone                 | a125 |
| Ligusticum wallichii | 24-Ethylidene Lophenol            | a16 | Salvia miltiorrhiza   | Salviol                   | a126 |
| Ligusticum wallichii | 3(S)-3-Butyl-4,5-Dihydrophthalide | a17 | Salvia miltiorrhiza   | Samaderin A               | a127 |
| Ligusticum wallichii | 3-Carene                          | a18 | Salvia miltiorrhiza   | Tanshinone II A           | a128 |
| Ligusticum wallichii | droxy-4,5,6,7-Tetrahydro-6,7-Dihy | a19 | Salvia miltiorrhiza   | Tanshinone II B           | a129 |
| Ligusticum wallichii | 5,6-Dihydroergosterol             | a20 | Salvia miltiorrhiza   | Tanshinone VI             | a130 |
| Ligusticum wallichii | Alpha-Humulene                    | a21 | Salvia miltiorrhiza   | Tanshiquinone B           | a131 |
| Ligusticum wallichii | Alpha-Phellandrene                | a22 | Salvia miltiorrhiza   | Ursolicacid               | a132 |
| Ligusticum wallichii | Alpha-Pinene                      | a23 | lycium barbarum       | Betaine                   | a133 |
| Ligusticum wallichii | Alpha-Terpinene                   | a24 | Polygonum multiflorum | Chrysarobin               | a134 |
| Ligusticum wallichii | Alpha-Terpineol                   | a25 | Polygonum multiflorum | Chryszazin                | a135 |
| Ligusticum wallichii | Alpha-Terpinolene                 | a26 | Polygonum multiflorum | Citreorosein              | a136 |
| Ligusticum wallichii | Beta-Elemene                      | a27 | Polygonum multiflorum | Emodin                    | a137 |
| Ligusticum wallichii | Beta-Eudesmol                     | a28 | Polygonum multiflorum | Emodin Anthrone           | a138 |
| Ligusticum wallichii | Beta-Pinene                       | a29 | Polygonum multiflorum | Fetidine                  | a139 |
| Ligusticum wallichii | Borneol                           | a30 | Polygonum multiflorum | N-Trans-Feruloyltyramine  | a140 |
| Ligusticum wallichii | Butylidenecyclohexane             | a31 | Polygonum multiflorum | Physcion                  | a141 |
| Ligusticum wallichii | Caffeic Acid Dimethyl Ether       | a32 | Polygonum multiflorum | Polygalacic Acid          | a142 |
| Ligusticum wallichii | Camphene                          | a33 | Polygonum multiflorum | Polygodial                | a143 |
| Ligusticum wallichii | Camphor                           | a34 | Polygonum multiflorum | Questin                   | a144 |
| Ligusticum wallichii | Choline                           | a35 | Polygonum multiflorum | Resveratrol               | a145 |
| Ligusticum wallichii | Chrysanthemaxanthin               | a36 | Polygonum multiflorum | Rhein                     | a146 |
| Ligusticum wallichii | chuanxiongzine                    | a37 | Polygonum multiflorum | Tetrahydroxytaxadiene     | a147 |
| Ligusticum wallichii | Cibarian                          | a38 | Carthamus tinctorius  | 1-Heptadecene             | a148 |
| Ligusticum wallichii | Citronellol                       | a39 | Carthamus tinctorius  | 1-Hexadecene              | a149 |
| Ligusticum wallichii | Citronellyl Acetate               | a40 | Carthamus tinctorius  | 2-Hexanol                 | a150 |
| Ligusticum wallichii | Cnidilide                         | a41 | Carthamus tinctorius  | 3-Hexanol                 | a151 |
| Ligusticum wallichii | Cnidium Lactone                   | a42 | Carthamus tinctorius  | Alpha-Onocerin            | a152 |
| Ligusticum wallichii | Cocaine                           | a43 | Carthamus tinctorius  | Arachidic Acid            | a153 |
| Ligusticum wallichii | Dibutyl Phthalate                 | a44 | Carthamus tinctorius  | Carthamidin               | a154 |
| Ligusticum wallichii | Enanthaldehyde                    | a45 | Carthamus tinctorius  | Carvacrol                 | a155 |
| Ligusticum wallichii | Ethyl Hexadecanoate               | a46 | Carthamus tinctorius  | Clerosterol               | a156 |
| Ligusticum wallichii | Ethyl Linoleate                   | a47 | Carthamus tinctorius  | Dehydroshikimic Acid      | a157 |
| Ligusticum wallichii | Ethyl Palmitate                   | a48 | Carthamus tinctorius  | Kaempferol                | a158 |
| Ligusticum wallichii | Ethylisoheptadecanoate            | a49 | Carthamus tinctorius  | Lauric Aldehyde           | a159 |
| Ligusticum wallichii | Ethylisooctadecanoate             | a50 | Carthamus tinctorius  | Linoleyl Acetate          | a160 |

|                      |                               |      |                      |                        |      |
|----------------------|-------------------------------|------|----------------------|------------------------|------|
| Ligusticum wallichii | Fenchone                      | a51  | Carthamus tinctorius | Neocarthamin           | a161 |
| Ligusticum wallichii | Gamma-Terpinene               | a52  | Carthamus tinctorius | Neocembrene            | a162 |
| Ligusticum wallichii | Heptadecanol                  | a53  | Carthamus tinctorius | Quercetin              | a163 |
| Ligusticum wallichii | Hexadecanoic Acid             | a54  | Carthamus tinctorius | Safranal               | a164 |
| Ligusticum wallichii | Hexadecanol                   | a55  | Carthamus tinctorius | Sagittariol            | a165 |
| Ligusticum wallichii | Humulene                      | a56  | Carthamus tinctorius | Stearin                | a166 |
| Ligusticum wallichii | Limonene                      | a57  | Cyperus rotundus     | Alpha-Cyperone         | a167 |
| Ligusticum wallichii | Linalool                      | a58  | Cyperus rotundus     | Beta-Selinene          | a168 |
| Ligusticum wallichii | Linoleic Acid                 | a59  | Cyperus rotundus     | Copadiene              | a169 |
| Ligusticum wallichii | L-Valine-L-Valine Anhydride   | a60  | Cyperus rotundus     | Cyperene               | a170 |
| Ligusticum wallichii | Menthyl Acetate               | a61  | Cyperus rotundus     | Cyperol                | a171 |
| Ligusticum wallichii | Methyl Eugenol                | a62  | Cyperus rotundus     | Cyperolone             | a172 |
| Ligusticum wallichii | Methyl Hexadecanoate          | a63  | Cyperus rotundus     | Isocyperol             | a173 |
| Ligusticum wallichii | Methyl Linoleate              | a64  | Cyperus rotundus     | Isokobusone            | a174 |
| Ligusticum wallichii | Methyl Palmitate              | a65  | Cyperus rotundus     | Kobusone               | a175 |
| Ligusticum wallichii | Methyl Pentadecanoate         | a66  | Cyperus rotundus     | Patchoulone            | a176 |
| Ligusticum wallichii | Methyl Phenyl Carbinol        | a67  | Cyperus rotundus     | Rotundone              | a177 |
| Ligusticum wallichii | Methyl Phenylacetate          | a68  | Cyperus rotundus     | Sugetriol              | a178 |
| Ligusticum wallichii | Myrcene                       | a69  | Rhizoma corydalis    | (+)-Corydaline         | a179 |
| Ligusticum wallichii | Naphthalene                   | a70  | Rhizoma corydalis    | Allocriptopine         | a180 |
| Ligusticum wallichii | N-Butyl-2-Ethylbutylphthalate | a71  | Rhizoma corydalis    | Canadine               | a181 |
| Ligusticum wallichii | Neocnidilide                  | a72  | Rhizoma corydalis    | Canaline               | a182 |
| Ligusticum wallichii | O-Cresol                      | a73  | Rhizoma corydalis    | Columbamine            | a183 |
| Ligusticum wallichii | Octanol                       | a74  | Rhizoma corydalis    | Corchoroside A         | a184 |
| Ligusticum wallichii | O-Ethylphenol                 | a75  | Rhizoma corydalis    | Corycavine             | a185 |
| Ligusticum wallichii | Oleic Acid                    | a76  | Rhizoma corydalis    | Corydaline             | a186 |
| Ligusticum wallichii | P-Cymene                      | a77  | Rhizoma corydalis    | Corydalmine            | a187 |
| Ligusticum wallichii | Pentadecanoic Acid            | a78  | Rhizoma corydalis    | Corydamine             | a188 |
| Ligusticum wallichii | Pentadecanol                  | a79  | Rhizoma corydalis    | Corydine               | a189 |
| Ligusticum wallichii | Pentylbenzene                 | a80  | Rhizoma corydalis    | Corytuberine           | a190 |
| Ligusticum wallichii | Perlolryne                    | a81  | Rhizoma corydalis    | Dehydrocorydaline      | a191 |
| Ligusticum wallichii | Retinol                       | a82  | Rhizoma corydalis    | Dehydrocorydalmine     | a192 |
| Ligusticum wallichii | Sabinene                      | a83  | Rhizoma corydalis    | Dehydrocostus Lactone  | a193 |
| Ligusticum wallichii | Senkyunolide B                | a84  | Rhizoma corydalis    | Glaucine               | a194 |
| Ligusticum wallichii | Senkyunolide G                | a85  | Rhizoma corydalis    | Isocorydine            | a195 |
| Ligusticum wallichii | Senkyunolide K                | a86  | Rhizoma corydalis    | Isocorynoline          | a196 |
| Ligusticum wallichii | Spathulenol                   | a87  | Rhizoma corydalis    | Isocorypalmine         | a197 |
| Ligusticum wallichii | Terpinen-4-Ol                 | a88  | Rhizoma corydalis    | Isocrotonylpterosin B  | a198 |
| Ligusticum wallichii | Tetradecane                   | a89  | Rhizoma corydalis    | Methyl Leptol B        | a199 |
| Ligusticum wallichii | Tetramethylpyrazine           | a90  | Rhizoma corydalis    | Norisocorydine         | a200 |
| Ligusticum wallichii | Thymol                        | a91  | Rhizoma corydalis    | Norjuzunal             | a201 |
| Ligusticum wallichii | Trans-Beta-Farnesene          | a92  | Rhizoma corydalis    | Palmatine              | a202 |
| Ligusticum wallichii | Trans-Caryophyllene           | a93  | Rhizoma corydalis    | Palmidin A             | a203 |
| Ligusticum wallichii | Vallesiachotamine             | a94  | Rhizoma corydalis    | Protopine              | a204 |
| Ligusticum wallichii | Vitamin B1                    | a95  | Rhizoma corydalis    | Protoporphyrin         | a205 |
| Salvia miltiorrhiza  | 1-Hydroxytaxinine A           | a96  | Rhizoma corydalis    | Reticulin              | a206 |
| Salvia miltiorrhiza  | 6-Hydroxymethylumazin         | a97  | Rhizoma corydalis    | Reticuline             | a207 |
| Salvia miltiorrhiza  | Cryptoxanthin                 | a98  | Rhizoma corydalis    | Scoulerine             | a208 |
| Salvia miltiorrhiza  | danshensu                     | a99  | Rhizoma corydalis    | Stylopine              | a209 |
| Salvia miltiorrhiza  | danshenxinkun A               | a100 | Rhizoma corydalis    | Stypanrol              | a210 |
| Salvia miltiorrhiza  | Daphneolone                   | a101 | Rhizoma corydalis    | Tetrahydrocorysamine   | a211 |
| Salvia miltiorrhiza  | Dauricine                     | a102 | Rhizoma corydalis    | Tetrahydropalmatine    | a212 |
| Salvia miltiorrhiza  | Dehydromiltirone              | a103 | Rhizoma corydalis    | Thaliporphine          | a213 |
| Salvia miltiorrhiza  | Dehydrotremetone              | a104 | Rhizoma corydalis    | Yuanhunine             | a214 |
| Salvia miltiorrhiza  | Dihydroisotanshinone I        | a105 | Rhizoma corydalis    | Yuehchukene            | a215 |
| Salvia miltiorrhiza  | Salvia miltiorrhiza           | a106 | Multiple drugs       | 20-Hexadecanoylingenol | T1   |

|                     |                     |      |                |                  |    |
|---------------------|---------------------|------|----------------|------------------|----|
| Salvia miltiorrhiza | Salvia miltiorrhiza | a107 | Multiple drugs | Caffeicacid      | T2 |
| Salvia miltiorrhiza | Salvia miltiorrhiza | a108 | Multiple drugs | Caffeicacid      | T3 |
| Salvia miltiorrhiza | Isocryptotanshinone | a109 | Multiple drugs | Gamma-Sitosterol | T4 |
| Salvia miltiorrhiza | Isocucurbitacin D   | a110 | Multiple drugs | Gamma-Sitosterol | T5 |

**Supplementary Table 2. Core compounds.**

| TCM                 | Compounds              | Betweenness centrality | Degree |
|---------------------|------------------------|------------------------|--------|
| Salvia miltiorrhiza | Tanshinone IIA         | 0.043                  | 48     |
| Salvia miltiorrhiza | Neotanshinone C        | 0.043                  | 48     |
| Salvia miltiorrhiza | Neocryptotanshinone II | 0.043                  | 48     |
| Salvia miltiorrhiza | Miltionone I           | 0.043                  | 48     |
| Cyperus rotundus    | Patchoulenone          | 0.0672                 | 41     |

**Supplementary Table 3. Molecular docking results of compounds and target proteins.**

| Compounds              | Binding energies (kcal/mol) |               |               |               |
|------------------------|-----------------------------|---------------|---------------|---------------|
|                        | ALB                         | IL6           | INS           | TNF           |
| Miltionone I           | -9.25 ± 0.29                | -8.41 ± 0.02  | -8.41 ± 0.02  | -11.68 ± 1.28 |
| Neocryptotanshinone II | -10.43 ± 0.56               | -10.50 ± 0.20 | -10.43 ± 0.15 | -14.09 ± 0.13 |
| Neotanshinone C        | -10.19 ± 0.86               | -8.69 ± 0.08  | -8.93 ± 0.41  | -13.05 ± 0.32 |
| Patchoulenone          | -9.98 ± 0.16                | -9.61 ± 0.03  | -9.60 ± 0.10  | -13.24 ± 0.38 |
| Tanshinone IIA         | -8.73 ± 0.20                | -8.80 ± 0.01  | -8.80 ± 0.02  | -13.14 ± 0.06 |
